# Supplementary material for: Interpreting the 13 C ∕ 12 C ratio of carbon dioxide in an urban airshed in the Yangtze River Delta, China
Source: Copernicus journal article supplement (doi:10.5194/acp-17-3385-2017), 2017-03-09
Supplement: Supplementary file 1 [file acp-17-3385-2017-supplement.zip]

## Supplementary Information to

### Interpreting the $^{13}\text{C}/^{12}\text{C}$ ratio of carbon dioxide in an urban airshed in the Yangtze River Delta, China

Jiaping Xu<sup>1</sup>, Xuhui Lee<sup>1,2\*</sup>, Wei Xiao<sup>1</sup>, Chang Cao<sup>1</sup>, Shoudong Liu<sup>1</sup>, Xuefa Wen<sup>3</sup>, Jingzheng Xu<sup>1</sup>, Zhen Zhang<sup>1</sup>, Jiayu Zhao<sup>1</sup>

**Figure S1:** A sample time series of the  $^{12}\text{CO}_2$  and  $^{13}\text{CO}_2$  mole fractions in response to switching between ambient sampling mode and calibration mode. The measurement sequence is ambient, calibration gas 1, calibration gas 2, and ambient.

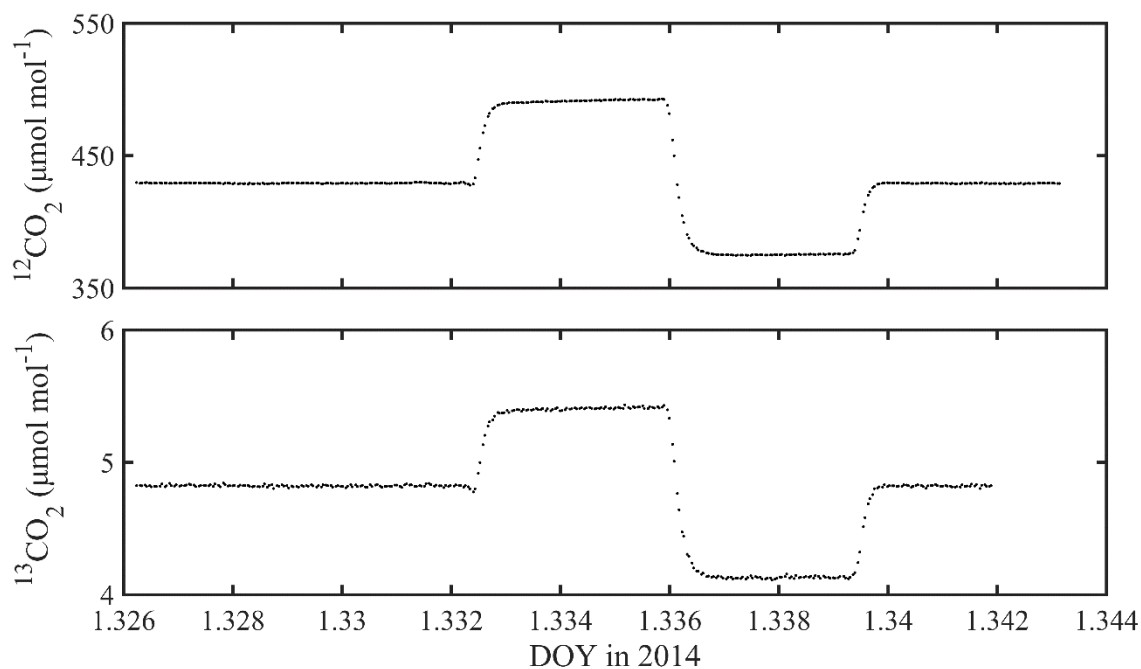

**Figure S2:** Application of the Miller-Tans method to daytime (10:00-16:00) and nighttime (22:00-6:00) data obtained in January 2014. Each data point is one hourly mean. The solid line is the ordinary least squares regression according to the original Miller-Tans Equation 1. Errors bounds on the regression coefficient are 95% confidence intervals. The background mole fraction and delta values are observations at the WMO baseline site WLG.

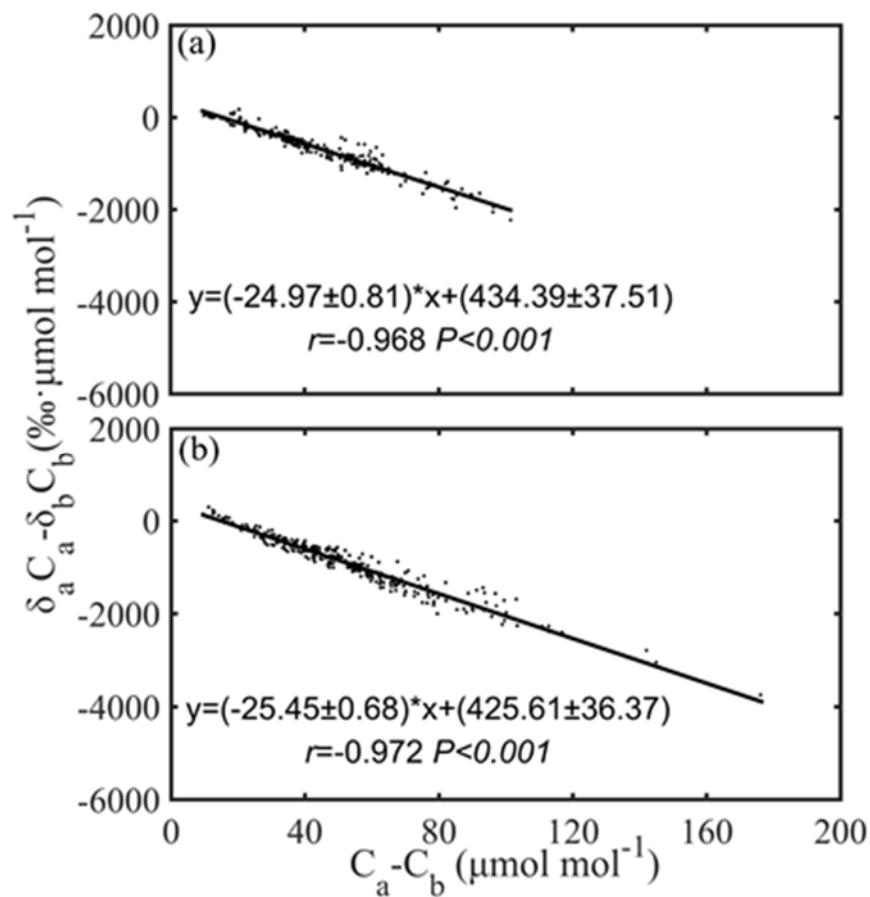

**Figure S3:** Application of the Miller-Tans method to the data obtained by Sturm et al. (2006) at Bern, Switzerland from 26 Apr to 1 May, 2004. Each data point is 12-minute mean. The solid line is the ordinary least squares regression according to the original Miller-Tans Equation 1. Errors bounds on the regression coefficient are 95% confidence intervals. The background mole fraction and delta values are observations at the WMO baseline site HUN (Hegyhatsal, Hungary).

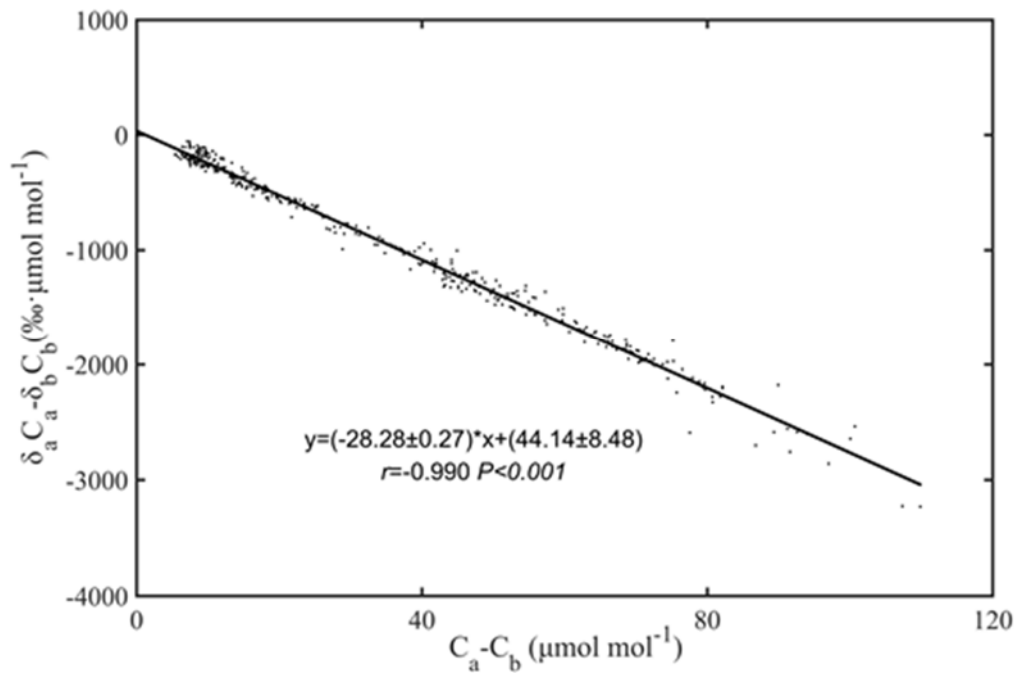

**Figure S4.** Same as Figure 7 but using  $\delta$ s obtained from the Keeling plot method.

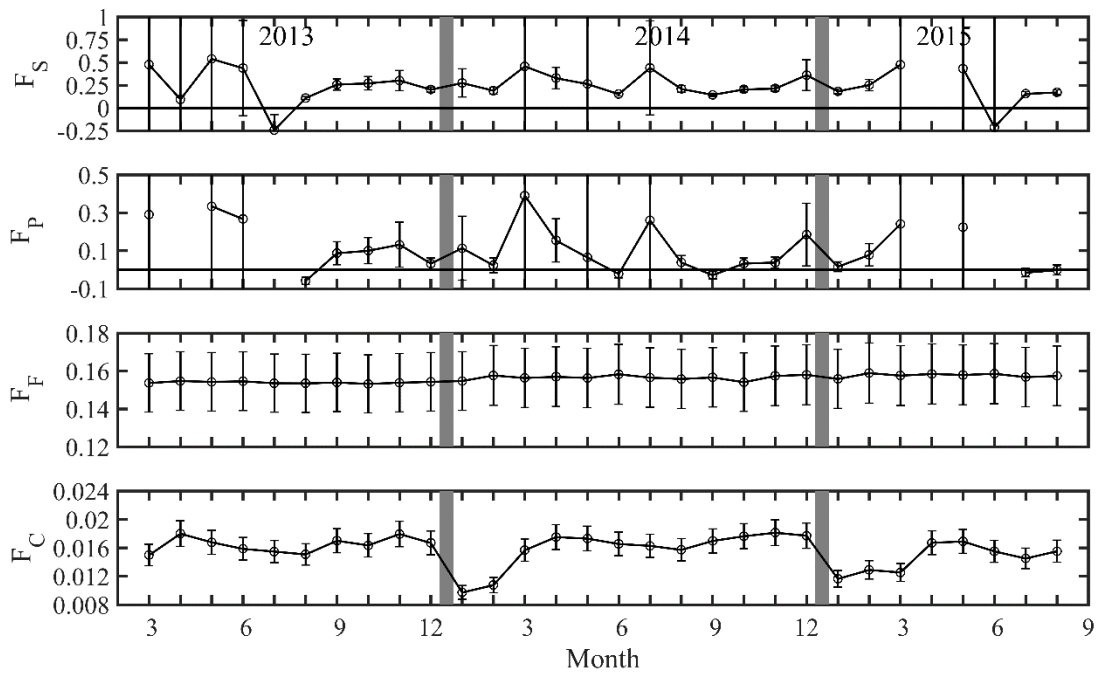

**Figure S5.** Same as Figure 8 but using  $\delta s$  obtained from the Keeling plot method.

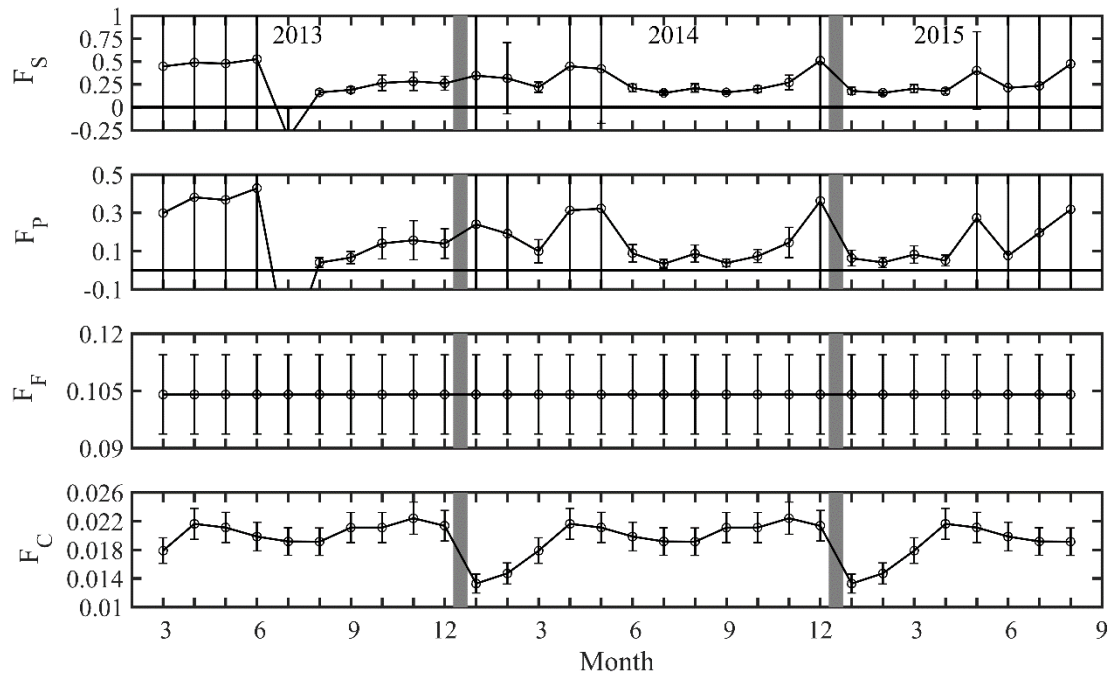

**Table S1:** Application of Miller-Tans method (Equation 1) to data obtained at urban sites.

| City                   | Period                | Reference                   | Background site | Slope          | Intercept        | R <sup>2</sup> |
|------------------------|-----------------------|-----------------------------|-----------------|----------------|------------------|----------------|
| Dallas Campus, Texas   | 1998 - 1999           | Clark-Thorne and Yapp, 2003 | MLO             | -29.44 ± 4.39  | 147.20 ± 102.93  | 0.869          |
| Dallas Downtown, Texas | 1998 - 1999           | Clark-Thorne and Yapp, 2003 | MLO             | -27.92 ± 3.13  | 104.10 ± 81.39   | 0.785          |
| Bangalore, India       | Oct 2008 - Nov 2008   | Guha et al., 2010           | SEY             | -27.03 ± 4.35  | 7.65 ± 112.16    | 0.880          |
| Paris                  | Dec 1997 - Apr 1999   | Widory, 2003                | AZR             | -28.64 ± 2.47  | 469.83 ± 229.74  | 0.983          |
| Salt Lake City, Utah   | Jan 2002              | Pataki et al., 2003         | MLO             | -34.25 ± 0.92  | -247.90 ± 72.10  | 0.997          |
| Salt Lake City, Utah   | Aug 2002              | Pataki et al., 2003         | MLO             | -28.63 ± 3.33  | -153.48 ± 39.34  | 0.961          |
| Pasadena CA            | April 2014 - Jul 2014 | Affek et al., 2005          | MLO             | -29.07 ± 20.09 | -232.22 ± 323.02 | 0.547          |
| Krakow, Poland         | Sep 1994              | Zimnoch et al. , 2004       | Schauinsland    | -27.96 ± 0.47  | -6.6 ± 11.14     | 0.999          |
| Beijing, China         | Aug 2013              | Pang et al., 2016           | WLG             | -26.84 ± 0.57  | -187.09 ± 10.16  | 0.908          |
| Bern, Switzerland      | 26 Apr - 1 May, 2004  | Sturm et al., 2006          | HUN             | -28.28 ± 0.27  | 44.14 ± 8.84     | 0.990          |

MLO – Mauna Loa, United States. Latitude 19.536, longitude -155.576, elevation 3397 m.

SEY – Mahe Island, Seychelles. Latitude -4.682, longitude 55.532, elevation 2 m.

AZR – Terceira Island, Azores, Portugal. Latitude 38.766, longitude: -27.375, elevation 19 m.

Schauinsland – Schauinsland, Germany. Latitude 47.92, longitude 7.92, elevation 1205 m.

WLG – Mt. Waliguan, China. Latitude 36.288, longitude 100.896, elevation 3810 m

HUN – Hegyhatsal, Hungary. Latitude 46.950, longitude 16.650, elevation 248 m.

**Table S2:** Comparison of the surface source  $^{13}\text{C}/^{12}\text{C}$  ratio determined with the Keeling plot and the Miller-Tans method (Equation 3). Results are averages for the whole experimental period.

| Methods            | Daytime              |         | Nighttime            |         |
|--------------------|----------------------|---------|----------------------|---------|
|                    | $\delta\text{s}$ (‰) | std (‰) | $\delta\text{s}$ (‰) | std (‰) |
| Miller-Tans method | -24.37               | 0.61    | -24.58               | 0.44    |
| Keeling plot       | -25.88               | 0.32    | -25.79               | 0.25    |

## List of References

- Affek, H. P., Eiler, J. M. (2006). Abundance of mass 47 CO<sub>2</sub> in urban air, car exhaust, and human breath. *Geochimica et Cosmochimica Acta* **70**(1): 1-12.
- Clark-Thorne, S. T., C. J. Yapp (2003). Stable carbon isotope constraints on mixing and mass balance of CO<sub>2</sub> in an urban atmosphere: Dallas metropolitan area, Texas, USA. *Applied Geochemistry* **18**(1): 75-95.
- Guha, T., P. Ghosh (2010). Diurnal variation of atmospheric CO<sub>2</sub> concentration and delta C-13 in an urban atmosphere during winter-role of the Nocturnal Boundary Layer. *Journal of Atmospheric Chemistry* **65**(1): 1-12.
- Pang, J., Wen, X., Sun, X. (2016). Mixing ratio and carbon isotopic composition investigation of atmospheric CO<sub>2</sub> in Beijing, China. *Sci Total Environ* **539**: 322-330.
- Pataki, D. E., Bowling, D.R., Ehleringer, J.R. (2003). Seasonal cycle of carbon dioxide and its isotopic composition in an urban atmosphere: Anthropogenic and biogenic effects. *Journal of Geophysical Research-Atmospheres* **108**(D23): 1-8.
- Schmidt, M., Graul, R., Sartorius, H., and Levin, I. (1996). Carbon dioxide and methane in continental Europe: a climatology, and <sup>222</sup>Rn-based emission estimates, *Tellus*, **48B**: 457–473.
- Sturm, P., Leuenberger, M., Valentino, F. L., Lehmann, B. and Ihly B. (2006). Measurements of CO<sub>2</sub>, its stable isotopes, O<sub>2</sub>/N<sub>2</sub>, and <sup>222</sup>Rn at Bern, Switzerland. *Atmos. Chem. Phys.*, **6**: 1991–2004.
- Widory, D., M. Javoy (2003). The carbon isotope composition of atmospheric CO<sub>2</sub> in Paris. *Earth and Planetary Science Letters* **215**(1-2): 289-298.
- Zimnoch, M., Florkowski, T., Necki, J. M., Neubert, R. E. (2004). Diurnal variability of  $\delta^{13}\text{C}$  and  $\delta^{18}\text{O}$  of atmospheric CO<sub>2</sub> in the urban atmosphere of Kraków, Poland. *Isotopes in Environmental and Health Studies*, **40**(2), 129-143.
