# Supplementary material for: Interpreting the 13 C ∕ 12 C ratio of carbon dioxide in an urban airshed in the Yangtze River Delta, China
Source: Copernicus journal article supplement (doi:10.5194/acp-17-3385-2017), 2017-03-09
Supplement: Supplementary file 2 [file acp-17-3385-2017-supplement.zip]

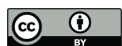

*Supplement of*

**Interpreting the  $^{13}\text{C} / ^{12}\text{C}$  ratio of carbon dioxide in an urban airshed in the Yangtze River Delta, China**

**Jiaping Xu et al.**

*Correspondence to:* Xuhui Lee (xuhui.lee@yale.edu)

- acp-17-3385-2017-supplement-title-page.pdf
- Supplementary\_Information4.pdf
- data\_supplement\_final.xls

The copyright of individual parts of the supplement might differ from the CC-BY 3.0 licence.
